# Supplementary material for: Estimating plant biomass in agroecosystems using a drop-plate meter
Source: PeerJ. 2023 Aug 2;11:e15740. doi: 10.7717/peerj.15740 (PMC10404029; doi:10.7717/peerj.15740)
Supplement: Supplemental Information 1 [file peerj-11-15740-s001.xlsx]

## Sheet: Sheet1
State	Site_No	DP24	BM	Commodity
NE	1133	10	245.07	alfalfa
NE	1133	11	245.37	alfalfa
NE	1133	19	209.47	alfalfa
NE	1133	18	189.27	alfalfa
MN/WI	1367	25	41.67	alfalfa
MN/WI	1367	15	57.37	alfalfa
MN/WI	1367	ND	21.97	alfalfa
MN/WI	1367	ND	35.47	alfalfa
MN/WI	1373	10	41.27	alfalfa
MN/WI	1373	10	73.87	alfalfa
MN/WI	1373	8	92.07	alfalfa
MN/WI	1373	4	98.87	alfalfa
KS	1163	11	23.07	alfalfa
KS	1163	7.5	18.87	alfalfa
KS	1163	8	16.17	alfalfa
KS	1163	12.5	22.37	alfalfa
CA	1000	2.5	29.5	almonds
CA	1000	3.5	24.2	almonds
CA	1000	2.5	22.1	almonds
CA	1000	1.5	13.1	almonds
CA	1001	0.5	0	almonds
CA	1001	0.5	0.6	almonds
CA	1001	0.5	1	almonds
CA	1001	0.5	0	almonds
CA	1002	1.5	38.7	almonds
CA	1002	0.5	0	almonds
CA	1002	1	0.8	almonds
CA	1002	0.5	0	almonds
CA	1003	0.5	0	almonds
CA	1003	1	6.5	almonds
CA	1003	0.5	0	almonds
CA	1003	1	30.7	almonds
CA	1004	1	0.4	almonds
CA	1004	1.5	8.5	almonds
CA	1004	1.5	5.6	almonds
CA	1004	1	0	almonds
CA	1005	1.5	25.7	almonds
CA	1005	1	78.8	almonds
CA	1005	1.5	76.1	almonds
CA	1005	6.5	54.5	almonds
CA	1006	1.5	11.3	almonds
CA	1006	1	33.1	almonds
CA	1006	2	15.8	almonds
CA	1006	1	24.5	almonds
CA	1007	1	12.4	almonds
CA	1007	1	0	almonds
CA	1007	1	7.2	almonds
CA	1007	0	0.4	almonds
CA	1008	2	83.5	almonds
CA	1008	0.5	2.1	almonds
CA	1008	0.5	0.4	almonds
CA	1008	0.5	0	almonds
CA	1009	2	35.1	almonds
CA	1009	2.5	33.5	almonds
CA	1009	1	3.6	almonds
CA	1009	3	36.8	almonds
CA	1010	2	0	almonds
CA	1010	3.5	17.3	almonds
CA	1010	0.5	20.9	almonds
CA	1010	3	27.8	almonds
CA	1011	7	34.8	almonds
CA	1011	6	54.6	almonds
CA	1011	10	40.9	almonds
CA	1011	3.5	39	almonds
CA	1012	8	33.2	almonds
CA	1012	2	56.1	almonds
CA	1012	2.5	44.3	almonds
CA	1012	4.5	34.4	almonds
CA	1013	2.5	0	almonds
CA	1013	4	0	almonds
CA	1013	0.5	39.5	almonds
CA	1013	1.5	22.4	almonds
CA	1014	2	50.5	almonds
CA	1014	1	7.3	almonds
CA	1014	3	29.6	almonds
CA	1014	5	27.3	almonds
CA	1015	6.5	50.4	almonds
CA	1015	10	74	almonds
CA	1015	6	66.7	almonds
CA	1015	9	38.9	almonds
CA	1016	0.5	13.6	almonds
CA	1016	0.5	0	almonds
CA	1016	1.5	7.1	almonds
CA	1016	0.5	0	almonds
CA	1017	9	48.7	almonds
CA	1017	7	89.3	almonds
CA	1017	13.5	79.9	almonds
CA	1017	7	72.8	almonds
CA	1018	11.5	16.9	almonds
CA	1018	20	30.5	almonds
CA	1018	8	27.7	almonds
CA	1018	15	42.4	almonds
CA	1019	0.5	0	almonds
CA	1019	1	0	almonds
CA	1019	0	1.1	almonds
CA	1019	0	4.9	almonds
CA	1020	1.5	19.7	almonds
CA	1020	9.5	27.1	almonds
CA	1020	5	33.9	almonds
CA	1020	0.3	5.2	almonds
CA	1021	0	0	almonds
CA	1021	0.5	5.2	almonds
CA	1021	0.5	0	almonds
CA	1021	1	21.7	almonds
CA	1022	6	47	almonds
CA	1022	7	34.7	almonds
CA	1022	3.5	28	almonds
CA	1022	6	56.8	almonds
CA	1023	2	13.9	almonds
CA	1023	3	14.7	almonds
CA	1023	2.5	32.2	almonds
CA	1023	1.5	12.1	almonds
CA	1024	1.5	13.7	almonds
CA	1024	0.5	0	almonds
CA	1024	2	18	almonds
CA	1024	1.5	15.7	almonds
CA	1025	4	41.1	almonds
CA	1025	3	39.6	almonds
CA	1025	3.5	36.1	almonds
CA	1025	2	15.3	almonds
CA	1026	0.5	6.6	almonds
CA	1026	0.5	3.7	almonds
CA	1026	1	32.6	almonds
CA	1026	3	29.7	almonds
CA	1027	0	0	almonds
CA	1027	0.5	18.8	almonds
CA	1027	0.5	0	almonds
CA	1027	3	84.7	almonds
CA	1028	3	38.7	almonds
CA	1028	4.5	43.2	almonds
CA	1028	5.5	29.8	almonds
CA	1028	4.5	37.5	almonds
CA	1029	2	43.6	almonds
CA	1029	3	23.3	almonds
CA	1029	2.5	53.8	almonds
CA	1029	2	94.4	almonds
WA	1064	na	0.9	apples
WA	1064	na	0.1	apples
WA	1064	na	71.9	apples
WA	1064	na	75.4	apples
WA	1065	1	4	apples
WA	1065	1	3.4	apples
WA	1065	10	35.3	apples
WA	1065	3	14.2	apples
WA	1066	4	21.5	apples
WA	1066	4	9.6	apples
WA	1066	1	8.9	apples
WA	1066	3	6.8	apples
WA	1067	4	7.7	apples
WA	1067	4	11.6	apples
WA	1067	6	18.4	apples
WA	1067	6.5	19	apples
WA	1068	5	2.7	apples
WA	1068	5	22.3	apples
WA	1068	10	24.5	apples
WA	1068	2	7.8	apples
WA	1069	3	6.1	apples
WA	1069	1	4.5	apples
WA	1069	4.5	8	apples
WA	1069	4.5	10.5	apples
WA	1070	1	0	apples
WA	1070	4	10.9	apples
WA	1070	1	12.8	apples
WA	1070	6	26.3	apples
WA	1071	2.5	0.5	apples
WA	1071	2	3	apples
WA	1071	4	12.4	apples
WA	1071	4.5	12.6	apples
WA	1072	5	2.1	apples
WA	1072	3.5	12.1	apples
WA	1072	2	6.3	apples
WA	1072	23	93.3	apples
WA	1073	2.5	5	apples
WA	1073	4	10.4	apples
WA	1073	3	17.3	apples
WA	1073	4	8	apples
WA	1074	1.5	0	apples
WA	1074	5.5	31.5	apples
WA	1074	4.5	28	apples
WA	1074	5	35.9	apples
WA	1075	10.5	20.1	apples
WA	1075	3	8.2	apples
WA	1075	8.5	21.2	apples
WA	1075	7.5	10.1	apples
WA	1076	6	26.3	apples
WA	1076	2.5	12.7	apples
WA	1076	3	10.6	apples
WA	1076	4	14.1	apples
WA	1077	8	29.3	apples
WA	1077	2.5	9	apples
WA	1077	4	41.6	apples
WA	1077	3.5	17.9	apples
WA	1078	3	0	apples
WA	1078	1	0	apples
WA	1078	4	2.4	apples
WA	1078	4.5	12.9	apples
WA	1079	3	22.8	apples
WA	1079	2.5	13.4	apples
WA	1079	3	23	apples
WA	1079	4	20.5	apples
WA	1080	2	7.6	apples
WA	1080	3	20.5	apples
WA	1080	2.5	18.9	apples
WA	1080	1	8.7	apples
WA	1081	5	18.3	apples
WA	1081	5.5	15.5	apples
WA	1081	6.5	20.8	apples
WA	1081	5	14.1	apples
WA	1082	8	60.4	apples
WA	1082	2.5	20	apples
WA	1082	3	18.7	apples
WA	1082	4	13.4	apples
WA	1083	2	11.8	apples
WA	1083	1	36.6	apples
WA	1083	5	17.5	apples
WA	1083	3	14.1	apples
MT	1110	2	3.4	barley
MT	1110	2.5	16.57	barley
MT	1110	2.5	1.1	barley
MT	1110	3	1.4	barley
MT	1120	3	1.2	barley
MT	1120	6	6.8	barley
MT	1120	4	36.07	barley
MT	1120	5	15.87	barley
MT	1114	6	19.47	barley
MT	1114	3	7.9	barley
MT	1114	6.5	7.7	barley
MT	1114	6	5.4	barley
MT	1122	8.5	16.17	barley
MT	1122	9.5	10.57	barley
MT	1122	9	18.97	barley
MT	1122	10	16.67	barley
ND	1409	54	62.77	canola
ND	1409	12	23.77	canola
ND	1409	33	52.57	canola
ND	1409	60	91.67	canola
WA	1045	2	11	cherries
WA	1045	2	7.6	cherries
WA	1045	2.5	13	cherries
WA	1045	n/a	28.4	cherries
WA	1046	2.5	**	cherries
WA	1046	1.5	4.1	cherries
WA	1046	1	1.8	cherries
WA	1046	0.5	**	cherries
WA	1047	2	2.8	cherries
WA	1047	3	29	cherries
WA	1047	3.5	68.1	cherries
WA	1047	2	30	cherries
WA	1048	4	58.2	cherries
WA	1048	8	85.3	cherries
WA	1048	2	7.7	cherries
WA	1048	2	16.2	cherries
WA	1049	1	1.7	cherries
WA	1049	3	55.8	cherries
WA	1049	1	21.2	cherries
WA	1049	3.5	22.4	cherries
WA	1050	5.5	57.4	cherries
WA	1050	2.5	19.4	cherries
WA	1050	1.5	22.9	cherries
WA	1050	1.5	14	cherries
WA	1051	6	60.8	cherries
WA	1051	3	25.8	cherries
WA	1051	5.5	41.3	cherries
WA	1051	7	57.1	cherries
WA	1052	0	*	cherries
WA	1052	2.5	25.4	cherries
WA	1052	3.5	29.3	cherries
WA	1052	5.5	42	cherries
WA	1053	1	2.3	cherries
WA	1053	5	2.1	cherries
WA	1053	3.5	24	cherries
WA	1053	4	34.4	cherries
WA	1054	2	1.4	cherries
WA	1054	1.5	0.4	cherries
WA	1054	2.5	17.6	cherries
WA	1054	6.5	22.3	cherries
WA	1055	0	*	cherries
WA	1055	2	9.3	cherries
WA	1055	6	28.8	cherries
WA	1055	2.5	6.8	cherries
WA	1056	0.5	3.3	cherries
WA	1056	2	11	cherries
WA	1056	9.5	51.4	cherries
WA	1056	12	38.7	cherries
WA	1057	2.5	24.4	cherries
WA	1057	5	55.5	cherries
WA	1057	9	47.6	cherries
WA	1057	4.5	23.1	cherries
WA	1058	4	12.1	cherries
WA	1058	0.5	**	cherries
WA	1058	1	3.7	cherries
WA	1058	2	7.7	cherries
WA	1059	2.5	17.1	cherries
WA	1059	11.5	54	cherries
WA	1059	2.5	2.1	cherries
WA	1059	3.5	34.8	cherries
WA	1060	2	6	cherries
WA	1060	4.5	1.8	cherries
WA	1060	3.5	0.7	cherries
WA	1060	0	*	cherries
WA	1061	1.5	8.6	cherries
WA	1061	1	2.2	cherries
WA	1061	1	2.3	cherries
WA	1061	1	1.1	cherries
WA	1062	3.5	29.9	cherries
WA	1062	3.5	2.5	cherries
WA	1062	2	46.2	cherries
WA	1062	2.5	9.1	cherries
WA	1063	1	2.1	cherries
WA	1063	1.5	1.9	cherries
WA	1063	2	5.8	cherries
WA	1063	1.5	4.4	cherries
NE	1135	2.5	56.97	corn
NE	1135	3	110.77	corn
NE	1135	4	118.87	corn
NE	1135	3	142.77	corn
NE	1139	10	114.47	corn
NE	1139	4	112.07	corn
NE	1139	5	70.57	corn
NE	1139	4	36.67	corn
NE	1141	5	6.1	corn
NE	1141	4	9.77	corn
NE	1141	1	27.27	corn
NE	1141	2	8.9	corn
NE	1146	10	12	corn
NE	1146	13.5	1.5	corn
NE	1146	9	4.1	corn
NE	1146	11	4.4	corn
NE	1147	9	183.87	corn
NE	1147	6	175.07	corn
NE	1147	7	229.07	corn
NE	1147	7	151.87	corn
NE	1150	6	84.17	corn
NE	1150	3	68.47	corn
NE	1150	5	79.67	corn
NE	1150	3	86.27	corn
ND	1392	4	18.97	corn
ND	1392	2	27.77	corn
ND	1392	2	30.37	corn
ND	1392	2	41.77	corn
ND	1393	0	4.67	corn
ND	1393	1	26.87	corn
ND	1393	1	29.47	corn
ND	1393	0	42.07	corn
ND	1394	2	38.07	corn
ND	1394	1.5	40.27	corn
ND	1394	3.5	6.97	corn
ND	1394	2	43.57	corn
ND	1395	4	23.07	corn
ND	1395	1	3.67	corn
ND	1395	2	11.67	corn
ND	1395	2.5	12.67	corn
ND	1399	3.5	16.37	corn
ND	1399	11	48.37	corn
ND	1399	6.5	39.57	corn
ND	1399	2	25.77	corn
MN/WI	1361	0.5	3.5	corn
MN/WI	1361	0.5	7.87	corn
MN/WI	1361	0.5	3.8	corn
MN/WI	1361	2	24.87	corn
MN/WI	1362	12	41.97	corn
MN/WI	1362	32.5	45.27	corn
MN/WI	1362	15	30.07	corn
MN/WI	1362	18.5	31.37	corn
IL	1260	0	0	corn
IL	1260	0	0	corn
IL	1260	0	0	corn
IL	1260	0	0	corn
IL	1261	1.5	4.97	corn
IL	1261	2	8.17	corn
IL	1261	2.5	0.87	corn
IL	1261	2.5	2.97	corn
IL	1262	NA	0	corn
IL	1262	NA	0	corn
IL	1262	NA	0	corn
IL	1262	NA	0	corn
IL	1271	2	0	corn
IL	1271	3	0	corn
IL	1271	1	0	corn
IL	1271	0	0	corn
IL	1273	2.5	0.87	corn
IL	1273	1.5	0.57	corn
IL	1273	1.5	0.67	corn
IL	1273	2	2.87	corn
IL	1274	2	8.97	corn
IL	1274	4	8.67	corn
IL	1274	4	23.57	corn
IL	1274	4	14.77	corn
MI	1291	8	7.27	corn
MI	1291	6	11.97	corn
MI	1291	9	44.57	corn
MI	1291	6	53.27	corn
MI	1292	5	2.17	corn
MI	1292	4	3.87	corn
MI	1292	4	32.37	corn
MI	1292	3	5.67	corn
MI	1293	2.5	20.97	corn
MI	1293	2	10.57	corn
MI	1293	5.5	50.27	corn
MI	1293	3	76.57	corn
MI	1295	4.5	163.67	corn
MI	1295	4	115.27	corn
MI	1295	4	199.77	corn
MI	1295	3	170.37	corn
MI	1296	2	6.67	corn
MI	1296	5	7.77	corn
MI	1296	4	39.67	corn
MI	1296	4	8.17	corn
MI	1297	18	76.37	corn
MI	1297	4	35.57	corn
MI	1297	9	53.67	corn
MI	1297	5	51.17	corn
MI	1298	2	21.57	corn
MI	1298	4	17.97	corn
MI	1298	3.5	26.77	corn
MI	1298	3	16.27	corn
MI	1299	4	47.07	corn
MI	1299	2	22.17	corn
MI	1299	3	47.97	corn
MI	1299	3	38.47	corn
MI	1300	ND	30.87	corn
MI	1300	14.5	27.37	corn
MI	1300	8	26.67	corn
MI	1300	4	30.27	corn
MI	1301	10	31.37	corn
MI	1301	4	19.47	corn
MI	1301	3	46.27	corn
MI	1301	4	34.07	corn
IA	1331	3	26.77	corn
IA	1331	4	11.17	corn
IA	1331	5	56.47	corn
IA	1331	6	26.27	corn
IA	1332	3	59.37	corn
IA	1332	4	59.67	corn
IA	1332	4	128.87	corn
IA	1332	3	122.27	corn
IA	1334	2	24.07	corn
IA	1334	2.5	9.67	corn
IA	1334	2	43.17	corn
IA	1334	2	31.17	corn
IA	1337	4	0.57	corn
IA	1337	4.5	3.17	corn
IA	1337	3	4.17	corn
IA	1337	3	3.2	corn
IA	1338	5	26.87	corn
IA	1338	2.5	30.47	corn
IA	1338	4	10.97	corn
IA	1338	2	24.07	corn
IA	1339	2	32.47	corn
IA	1339	2	45.47	corn
IA	1339	1.5	52.57	corn
IA	1339	2.5	58.97	corn
IA	1340	3.5	47.57	corn
IA	1340	2	32.67	corn
IA	1340	5	21.27	corn
IA	1340	2	16.47	corn
IA	1341	3	36.57	corn
IA	1341	3.5	66.47	corn
IA	1341	4	70.87	corn
IA	1341	3.5	68.67	corn
IA	1343	3	29.27	corn
IA	1343	1.5	21.07	corn
IA	1343	4	71.57	corn
IA	1343	4.5	84.07	corn
IA	1345	19	78.77	corn
IA	1345	4	66.37	corn
IA	1345	4	57.27	corn
IA	1345	3	38.07	corn
CO	1421	3	0.27	corn
CO	1421	0.5	0.17	corn
CO	1421	2.5	2.17	corn
CO	1421	1.5	1.07	corn
NE	1140	3.5	20.97	corn
NE	1140	7	25.17	corn
NE	1140	29	93.87	corn
NE	1140	7	56.97	corn
ND	1398	16	43.97	cover
ND	1398	11.5	50.77	cover
ND	1398	16	32.27	cover
ND	1398	13	51.57	cover
ND	1401	3	6.67	cover
ND	1401	4	65.17	cover
ND	1401	10	47.97	cover
ND	1401	8	52.57	cover
ND	1406	11	45.67	cover
ND	1406	10.5	121.47	cover
ND	1406	14	130.17	cover
ND	1406	23.5	105.67	cover
NE	1143	4	97.17	cover
NE	1143	6	91.17	cover
NE	1143	6	70.47	cover
NE	1143	6	103.27	cover
MT	1121	8	46.37	fallow
MT	1121	3.5	64.67	fallow
MT	1121	7	23.67	fallow
MT	1121	16	25.67	fallow
ND	1407	18	36.37	flax
ND	1407	15.5	79.97	flax
ND	1407	20.5	71.07	flax
ND	1407	17.5	88.77	flax
CA	1030	3.5	32.8	grapes
CA	1030	3	9.5	grapes
CA	1030	20	76.6	grapes
CA	1030	4	1	grapes
CA	1031	4.5	24.6	grapes
CA	1031	0.5	3.9	grapes
CA	1031	0.5	23.6	grapes
CA	1031	1	6.3	grapes
CA	1032	4.5	28.7	grapes
CA	1032	2.5	28.7	grapes
CA	1032	1.5	1.3	grapes
CA	1032	2	50.7	grapes
CA	1033	2	37.6	grapes
CA	1033	2	21.1	grapes
CA	1033	1	4.6	grapes
CA	1033	1.5	8.2	grapes
CA	1034	6	36.9	grapes
CA	1034	1.5	22.7	grapes
CA	1034	0.5	0	grapes
CA	1034	5.5	44.6	grapes
CA	1035	7	60	grapes
CA	1035	3	9.5	grapes
CA	1035	1.5	0	grapes
CA	1035	6	30	grapes
CA	1036	4	41.8	grapes
CA	1036	3.5	27.4	grapes
CA	1036	4	37.4	grapes
CA	1036	5.5	35.5	grapes
CA	1037	3.5	17.1	grapes
CA	1037	1.5	16.9	grapes
CA	1037	0.5	0	grapes
CA	1037	4.5	20.8	grapes
CA	1038	4	40.7	grapes
CA	1038	6.5	28.7	grapes
CA	1038	5.5	29	grapes
CA	1038	6	39.8	grapes
CA	1039	6.5	38.4	grapes
CA	1039	3	73.7	grapes
CA	1039	1	11.6	grapes
CA	1039	6	97	grapes
CA	1040	13.5	54.6	grapes
CA	1040	12.5	43.5	grapes
CA	1040	9	27.8	grapes
CA	1040	3	16.2	grapes
CA	1041	4	22.7	grapes
CA	1041	3.5	20.3	grapes
CA	1041	1.5	14.9	grapes
CA	1041	3.5	20	grapes
CA	1042	4.5	20.6	grapes
CA	1042	4.5	15.3	grapes
CA	1042	13	42.1	grapes
CA	1042	4	11.6	grapes
CA	1043	4.5	43.4	grapes
CA	1043	2.5	3	grapes
CA	1043	1.5	9	grapes
CA	1043	0.5	1.8	grapes
CA	1044	1.5	0	grapes
CA	1044	0	0	grapes
CA	1044	0	0	grapes
CA	1044	0	0	grapes
MN/WI	1375	46	120.97	kernza
MN/WI	1375	53	69.37	kernza
MN/WI	1375	19	233.27	kernza
MN/WI	1375	43	104.57	kernza
IL	1278	20.5	58.57	kernza
IL	1278	13	22.37	kernza
IL	1278	7.5	55.37	kernza
IL	1278	20	49.27	kernza
IL	1282	4.5	59.67	kernza
IL	1282	8	64.97	kernza
IL	1282	6	34.97	kernza
IL	1282	7	44.77	kernza
MT	1119	5	19.67	kernza
MT	1119	5	7.9	kernza
MT	1119	4	10.87	kernza
MT	1119	6.5	8.4	kernza
MT	1112	3	5.8	lentils
MT	1112	2.5	5.8	lentils
MT	1112	3	4.8	lentils
MT	1112	2	5.1	lentils
NE	1144	9	39.87	milo
NE	1144	9	143.67	milo
NE	1144	6	72.37	milo
NE	1144	3.5	39.17	milo
KS	1169	4.5	122.27	milo
KS	1169	2.5	92.97	milo
KS	1169	5	75.27	milo
KS	1169	3.5	83.37	milo
ND	1405	38	166.77	oats
ND	1405	66	123.37	oats
ND	1405	37	141.87	oats
ND	1405	36	149.87	oats
ND	1410	26	96.07	oats
ND	1410	25	65.87	oats
ND	1410	53	118.77	oats
ND	1410	28	154.87	oats
ND	1417	19	77.07	oats
ND	1417	4	16.47	oats
ND	1417	47	92.47	oats
ND	1417	24	55.37	oats
MN/WI	1365	35	123.17	oats
MN/WI	1365	30	100.87	oats
MN/WI	1365	27	120.07	oats
MN/WI	1365	33	162.97	oats
IA	1346	3.5	50.07	oats
IA	1346	6	37.07	oats
IA	1346	6	59.77	oats
IA	1346	5	48.97	oats
NE	1131	na	70.87	pasture
NE	1131	na	74.17	pasture
NE	1131	na	87.37	pasture
NE	1131	na	142.47	pasture
ND	1391	9	36.87	pasture
ND	1391	5	11.77	pasture
ND	1391	8	37.17	pasture
ND	1391	5	31.37	pasture
ND	1396	15	44.67	pasture
ND	1396	12	43.77	pasture
ND	1396	9.5	25.07	pasture
ND	1396	15	53.77	pasture
ND	1397	145	149.97	pasture
ND	1397	165	222.84	pasture
ND	1397	155	112.67	pasture
ND	1397	164	179.67	pasture
ND	1400	2.5	9.37	pasture
ND	1400	7	69.47	pasture
ND	1400	3.5	21.57	pasture
ND	1400	2.5	15.67	pasture
ND	1402	3	24.47	pasture
ND	1402	3.5	37.97	pasture
ND	1402	5.5	23.77	pasture
ND	1402	6.5	28.87	pasture
ND	1403	19	108.57	pasture
ND	1403	20	123.47	pasture
ND	1403	12	98.87	pasture
ND	1403	6	60.67	pasture
ND	1412	10	63.57	pasture
ND	1412	20	144.27	pasture
ND	1412	5	77.57	pasture
ND	1412	17	64.07	pasture
ND	1413	12	75.77	pasture
ND	1413	16	80.67	pasture
ND	1413	15	68.17	pasture
ND	1413	10	63.57	pasture
ND	1419	9	39.47	pasture
ND	1419	10	37.57	pasture
ND	1419	12.5	55.27	pasture
ND	1419	6.5	29.67	pasture
ND	1420	14	71.27	pasture
ND	1420	30	101.67	pasture
ND	1420	7.5	36.67	pasture
ND	1420	8.5	33.77	pasture
MN/WI	1366	22	62.57	pasture
MN/WI	1366	13.5	74.17	pasture
MN/WI	1366	25	53.77	pasture
MN/WI	1366	11	69.17	pasture
MN/WI	1370	10	38.07	pasture
MN/WI	1370	13	57.67	pasture
MN/WI	1370	20	70.37	pasture
MN/WI	1370	11	40.47	pasture
MN/WI	1377	10	40.97	pasture
MN/WI	1377	14	72.87	pasture
MN/WI	1377	8	30.57	pasture
MN/WI	1377	16	61.17	pasture
IL	1269	6.5	21.77	pasture
IL	1269	4	14.97	pasture
IL	1269	7	34.17	pasture
IL	1269	6	24.07	pasture
IL	1270	4.5	12.57	pasture
IL	1270	5.5	13.67	pasture
IL	1270	4	14.37	pasture
IL	1270	3	5.77	pasture
IL	1275	2.5	10.37	pasture
IL	1275	2	10.57	pasture
IL	1275	3	10.27	pasture
IL	1275	8	62.27	pasture
IL	1276	7.5	79.07	pasture
IL	1276	15	87.57	pasture
IL	1276	22	166.97	pasture
IL	1276	7.5	73.97	pasture
IL	1277	10	65.37	pasture
IL	1277	12	65.67	pasture
IL	1277	13	48.47	pasture
IL	1277	7.5	49.57	pasture
IL	1279	13.5	78.17	pasture
IL	1279	11	91.87	pasture
IL	1279	20	94.07	pasture
IL	1279	18	87.37	pasture
KS	1166	9	24.47	pasture
KS	1166	5	10.47	pasture
KS	1166	5	13.37	pasture
KS	1166	8	29.47	pasture
KS	1172	8	72.07	pasture
KS	1172	4	30.97	pasture
KS	1172	4	22.27	pasture
KS	1172	6	43.27	pasture
KS	1174	9	28.57	pasture
KS	1174	9	31.87	pasture
KS	1174	7	30.27	pasture
KS	1174	15	50.47	pasture
KS	1176	15.5	50.47	pasture
KS	1176	9	36.57	pasture
KS	1176	7	59.77	pasture
KS	1176	12	53.37	pasture
KS	1177	7.5	49.57	pasture
KS	1177	12	41.67	pasture
KS	1177	12	58.37	pasture
KS	1177	15.5	41.57	pasture
MT	1451	9	48.17	pasture
MT	1451	8	35.77	pasture
MT	1451	7	25.37	pasture
MT	1451	9.5	33.07	pasture
MT	1452	4.5	29.17	pasture
MT	1452	6	19.77	pasture
MT	1452	12	26.57	pasture
MT	1452	7.5	24.07	pasture
MT	1453	9.5	44.87	pasture
MT	1453	4	13.77	pasture
MT	1453	9	48.97	pasture
MT	1453	7	35.77	pasture
MT	1454	7	61.27	pasture
MT	1454	6	76.07	pasture
MT	1454	8	89.07	pasture
MT	1454	3.5	29.87	pasture
MT	1455	6.5	69.37	pasture
MT	1455	1.5	7.47	pasture
MT	1455	9	26.97	pasture
MT	1455	2.5	6.17	pasture
MT	1456	5	7.77	pasture
MT	1456	8.5	3.97	pasture
MT	1456	5	25.07	pasture
MT	1456	7	36.97	pasture
MT	1457	13	55.27	pasture
MT	1457	12	56.07	pasture
MT	1457	6	52.07	pasture
MT	1457	8	26.47	pasture
MT	1458	10.5	40.47	pasture
MT	1458	3	9.37	pasture
MT	1458	3	6.67	pasture
MT	1458	3	8.87	pasture
MT	1459	15	39.57	pasture
MT	1459	4.5	12.77	pasture
MT	1459	16	38.67	pasture
MT	1459	6	47.37	pasture
MT	1460	6	14.67	pasture
MT	1460	7	9.17	pasture
MT	1460	6	11.87	pasture
MT	1460	4	10.57	pasture
MT	1461	20	113.97	pasture
MT	1461	30	115.87	pasture
MT	1461	18	75.37	pasture
MT	1461	19	93.97	pasture
MT	1462	7	18.67	pasture
MT	1462	4.5	16.17	pasture
MT	1462	6	22.57	pasture
MT	1462	2.5	25.17	pasture
MT	1463	20	32.07	pasture
MT	1463	10	53.37	pasture
MT	1463	12	54.97	pasture
MT	1463	17	50.37	pasture
MT	1464	15.5	39.47	pasture
MT	1464	33	123.67	pasture
MT	1464	11	55.67	pasture
MT	1464	24.5	98.47	pasture
CO	1423	8	25.37	pasture
CO	1423	5	9.17	pasture
CO	1423	4.5	13.67	pasture
CO	1423	7	9.17	pasture
CO	1427	9	46.07	pasture
CO	1427	10	80.67	pasture
CO	1427	4	34.87	pasture
CO	1427	3	30.97	pasture
CO	1428	6	49.17	pasture
CO	1428	4.5	39.97	pasture
CO	1428	5.5	39.07	pasture
CO	1428	6	35.47	pasture
CO	1429	9	117.37	pasture
CO	1429	12	71.77	pasture
CO	1429	13	84.87	pasture
CO	1429	7.5	64.37	pasture
CO	1430	5	47.67	pasture
CO	1430	1.5	38.57	pasture
CO	1430	9	41.77	pasture
CO	1430	6	12.47	pasture
CO	1431	8.5	28.77	pasture
CO	1431	10	29.77	pasture
CO	1431	2	7.87	pasture
CO	1431	1.5	8.67	pasture
CO	1432	2	6.07	pasture
CO	1432	3	5.37	pasture
CO	1432	2	3.57	pasture
CO	1432	3	12.77	pasture
CO	1433	8	30.97	pasture
CO	1433	6.5	35.07	pasture
CO	1433	9	39.97	pasture
CO	1433	11.5	59.27	pasture
CO	1434	14.5	26.57	pasture
CO	1434	10.5	8.37	pasture
CO	1434	8	11.07	pasture
CO	1434	11	19.17	pasture
CO	1435	31	127.27	pasture
CO	1435	17	29.47	pasture
CO	1435	22	54.37	pasture
CO	1435	7	12.47	pasture
CO	1437	5	11.27	pasture
CO	1437	4.5	9.07	pasture
CO	1437	5	10.57	pasture
CO	1437	3.5	5.27	pasture
CO	1438	4.5	14.27	pasture
CO	1438	1	5.07	pasture
CO	1438	4	9.27	pasture
CO	1438	6	13.97	pasture
CO	1439	4	18.97	pasture
CO	1439	9	33.47	pasture
CO	1439	10.5	32.87	pasture
CO	1439	10	43.27	pasture
CO	1442	7	24.47	pasture
CO	1442	8.5	22.97	pasture
CO	1442	7	19.47	pasture
CO	1442	10	27.17	pasture
CO	1443	4	0	pasture
CO	1443	4	27.67	pasture
CO	1443	19	18.67	pasture
CO	1443	2	5.97	pasture
CO	1444	17	49.67	pasture
CO	1444	13	42.97	pasture
CO	1444	21	53.77	pasture
CO	1444	12	38.87	pasture
SD	1220	12	32.87	pasture
SD	1220	18	34.07	pasture
SD	1220	12	63.27	pasture
SD	1220	11	28.67	pasture
SD	1221	6.5	29.47	pasture
SD	1221	5.5	17.17	pasture
SD	1221	3	10.07	pasture
SD	1221	7.5	42.37	pasture
SD	1222	12	39.87	pasture
SD	1222	19	72.67	pasture
SD	1222	15.5	50.07	pasture
SD	1222	13	48.47	pasture
SD	1223	8	45.87	pasture
SD	1223	7.5	35.77	pasture
SD	1223	12	34.27	pasture
SD	1223	16	41.17	pasture
SD	1224	12	34.57	pasture
SD	1224	8	26.57	pasture
SD	1224	7	19.07	pasture
SD	1224	12	37.87	pasture
SD	1225	9	72.27	pasture
SD	1225	7	18.37	pasture
SD	1225	16	57.67	pasture
SD	1225	17	81.17	pasture
SD	1226	10	19.07	pasture
SD	1226	7	21.17	pasture
SD	1226	8	20.57	pasture
SD	1226	6	19.07	pasture
SD	1227	11	86.47	pasture
SD	1227	13	50.47	pasture
SD	1227	3	19.17	pasture
SD	1227	11.5	70.57	pasture
SD	1228	9	41.87	pasture
SD	1228	10	32.77	pasture
SD	1228	8.5	53.87	pasture
SD	1228	13	40.77	pasture
SD	1229	23	90.97	pasture
SD	1229	16	47.67	pasture
SD	1229	29	73.97	pasture
SD	1229	10	25.07	pasture
SD	1230	8	34.27	pasture
SD	1230	18	56.47	pasture
SD	1230	20.5	54.37	pasture
SD	1230	10	94.77	pasture
SD	1231	9.5	36.27	pasture
SD	1231	12.5	35.97	pasture
SD	1231	20	21.37	pasture
SD	1231	15	56.67	pasture
SD	1232	19.5	51.97	pasture
SD	1232	15	47.57	pasture
SD	1232	13.5	51.77	pasture
SD	1232	15	58.57	pasture
SD	1233	9.5	29.97	pasture
SD	1233	8	29.47	pasture
SD	1233	9.5	24.57	pasture
SD	1233	10	34.17	pasture
SD	1234	4.5	18.77	pasture
SD	1234	4	13.27	pasture
SD	1234	7.5	50.37	pasture
SD	1234	10	42.27	pasture
SD	1235	9	52.57	pasture
SD	1235	17	55.37	pasture
SD	1235	17.5	56.27	pasture
SD	1235	17.5	27.37	pasture
SD	1236	11	87.37	pasture
SD	1236	8	52.47	pasture
SD	1236	4	34.87	pasture
SD	1236	10	26.17	pasture
SD	1237	9	20.17	pasture
SD	1237	11.5	29.07	pasture
SD	1237	8	43.57	pasture
SD	1237	7	33.27	pasture
SD	1238	6	20.97	pasture
SD	1238	5.5	16.57	pasture
SD	1238	4	14.97	pasture
SD	1238	6	16.37	pasture
SD	1239	9	173.27	pasture
SD	1239	15	230.67	pasture
SD	1239	19	143.87	pasture
SD	1239	20	137.07	pasture
SD	1240	25	117.77	pasture
SD	1240	17	111.47	pasture
SD	1240	16	86.97	pasture
SD	1240	27	103.87	pasture
SD	1241	42	97.47	pasture
SD	1241	13	83.37	pasture
SD	1241	17	67.47	pasture
SD	1241	10	62.67	pasture
SD	1242	6.5	16.47	pasture
SD	1242	17	66.37	pasture
SD	1242	20	67.17	pasture
SD	1242	14	79.57	pasture
SD	1243	5	55.17	pasture
SD	1243	6	32.67	pasture
SD	1243	7	22.87	pasture
SD	1243	9.5	50.27	pasture
NE	1132	3	69.17	soy
NE	1132	3.5	81.77	soy
NE	1132	4	87.67	soy
NE	1132	3.5	71.67	soy
ND	1404	1	1.27	soy
ND	1404	0.5	1.57	soy
ND	1404	1	1.97	soy
ND	1404	0.5	5.17	soy
MN/WI	1363	2.5	2.5	soy
MN/WI	1363	4	7.3	soy
MN/WI	1363	5	13.37	soy
MN/WI	1363	3	7.7	soy
MN/WI	1368	6.5	38.27	soy
MN/WI	1368	6	24.47	soy
MN/WI	1368	8	52.87	soy
MN/WI	1368	10	29.27	soy
MN/WI	1374	37	112.37	soy
MN/WI	1374	31	95.97	soy
MN/WI	1374	22	69.57	soy
MN/WI	1374	20	21.57	soy
IL	1263	36	55.07	soy
IL	1263	48	38.17	soy
IL	1263	36	53.97	soy
IL	1263	28	34.57	soy
IL	1264	4.5	243.17	soy
IL	1264	2	95.67	soy
IL	1264	3.5	212.57	soy
IL	1264	3	168.67	soy
IL	1265	2	60.47	soy
IL	1265	0	86.47	soy
IL	1265	4	90.17	soy
IL	1265	2	53.17	soy
IL	1266	28	73.97	soy
IL	1266	28.5	106.77	soy
IL	1266	19	53.77	soy
IL	1266	0.5	56.87	soy
IL	1267	1.5	82.67	soy
IL	1267	2	113.97	soy
IL	1267	2	93.27	soy
IL	1267	2	70.87	soy
IL	1268	5	180.17	soy
IL	1268	4	210.67	soy
IL	1268	7	212.07	soy
IL	1268	6	232.77	soy
IL	1272	3	146.47	soy
IL	1272	3	175.37	soy
IL	1272	2	116.77	soy
IL	1272	0	124.77	soy
IL	1280	2.5	123.47	soy
IL	1280	4	69.57	soy
IL	1280	3	25.97	soy
IL	1280	2.5	89.17	soy
IL	1281	1.5	24.87	soy
IL	1281	2.5	19.07	soy
IL	1281	1.5	33.67	soy
IL	1281	2	21.77	soy
IA	1333	4	58.07	soy
IA	1333	5	44.87	soy
IA	1333	4.5	90.47	soy
IA	1333	5	130.77	soy
IA	1335	na	NA	soy
IA	1335	na	NA	soy
IA	1335	na	NA	soy
IA	1335	na	NA	soy
IA	1336	6	38.17	soy
IA	1336	4	65.87	soy
IA	1336	2.5	76.77	soy
IA	1336	3	32.77	soy
IA	1342	4	118.07	soy
IA	1342	5	75.87	soy
IA	1342	3.5	97.37	soy
IA	1342	3.5	151.87	soy
IA	1344	5.5	113.67	soy
IA	1344	37	195.07	soy
IA	1344	6	139.97	soy
IA	1344	6	126.37	soy
IA	1347	47	150.17	soy
IA	1347	47	117.77	soy
IA	1347	42	135.97	soy
IA	1347	46	177.47	soy
IA	1348	3.5	69.27	soy
IA	1348	7	89.17	soy
IA	1348	4	104.67	soy
IA	1348	7	122.07	soy
KS	1162	12	12.77	soy
KS	1162	8	6.17	soy
KS	1162	15	18.87	soy
KS	1162	16.5	20.87	soy
KS	1165	4	16.87	soy
KS	1165	3	39.17	soy
KS	1165	2	24.47	soy
KS	1165	2.5	18.57	soy
KS	1167	20	50.97	soy
KS	1167	12	93.97	soy
KS	1167	5	100.17	soy
KS	1167	14	57.57	soy
KS	1170	2	4.17	soy
KS	1170	3	43.37	soy
KS	1170	2.5	9.47	soy
KS	1170	5	55.77	soy
KS	1173	3.5	16.07	soy
KS	1173	3	27.47	soy
KS	1173	4	22.37	soy
KS	1173	2.5	17.37	soy
NE	1136	4	190.67	soy
NE	1136	4	360.47	soy
NE	1136	4	171.57	soy
NE	1136	4	219.57	soy
NE	1137	2.5	131.57	soy
NE	1137	2	52.67	soy
NE	1137	3	155.87	soy
NE	1137	4	78.67	soy
NE	1142	4	171.37	soy
NE	1142	2.5	14.57	soy
NE	1142	1.5	21.77	soy
NE	1142	4	178.17	soy
NE	1138	18	50.47	soy
NE	1138	8	79.87	soy
NE	1138	5	300.17	soy
NE	1138	4	17.77	soy
NE	1134	9	255.97	unknown
NE	1134	6	308.37	unknown
NE	1134	5	139.47	unknown
NE	1134	6	240.97	unknown
CO	1422	0.5	6.07	unknown
CO	1422	4	16.67	unknown
CO	1422	1	11.97	unknown
CO	1422	1	9.37	unknown
CO	1440	na	0	vegetable
CO	1440	na	0	vegetable
CO	1440	na	0	vegetable
CO	1440	na	0	vegetable
CO	1424	1.5	0	vegetable
CO	1424	2.5	0	vegetable
CO	1424	1	0	vegetable
CO	1424	3	0	vegetable
CO	1425	3	0	vegetable
CO	1425	9.5	0	vegetable
CO	1425	12	0	vegetable
CO	1425	7.5	0	vegetable
CO	1426	2	0	vegetable
CO	1426	0	0	vegetable
CO	1426	2	0	vegetable
CO	1426	4	0	vegetable
CO	1436	45	0	vegetable
CO	1436	14	0	vegetable
CO	1436	8	0	vegetable
CO	1436	3	0	vegetable
CO	1441	19	0	vegetable
CO	1441	4	0	vegetable
CO	1441	23	0	vegetable
CO	1441	16	0	vegetable
MT	1107	16	34.07	wheat
MT	1107	7.5	39.87	wheat
MT	1107	18	69.27	wheat
MT	1107	16	53.17	wheat
MT	1109	5	20.17	wheat
MT	1109	6	25.07	wheat
MT	1109	4.5	16.67	wheat
MT	1109	5.5	35.87	wheat
MT	1118	2	0.8	wheat
MT	1118	2	0.5	wheat
MT	1118	3.5	0.7	wheat
MT	1118	4	2.2	wheat
WA	1084	29	141.1	wheat
WA	1084	39	121	wheat
WA	1084	41	137.7	wheat
WA	1084	48	149.4	wheat
WA	1085	24	56.5	wheat
WA	1085	34	121.9	wheat
WA	1085	26	83.4	wheat
WA	1085	45	106.4	wheat
WA	1086	21	41.3	wheat
WA	1086	10	17.6	wheat
WA	1086	18	27.5	wheat
WA	1086	13	119.8	wheat
WA	1087	38	87.4	wheat
WA	1087	45	84.4	wheat
WA	1087	41	102.3	wheat
WA	1087	49	90.2	wheat
WA	1088	33	58.6	wheat
WA	1088	31	75	wheat
WA	1088	36	74.6	wheat
WA	1088	33.5	77.2	wheat
WA	1089	36	58.4	wheat
WA	1089	36	85.4	wheat
WA	1089	45	94.2	wheat
WA	1089	47.5	101.3	wheat
WA	1090	45	80.5	wheat
WA	1090	45	95.7	wheat
WA	1090	46	57.8	wheat
WA	1090	44	96.3	wheat
WA	1091	39.5	100.8	wheat
WA	1091	51.5	103.2	wheat
WA	1091	44	98.1	wheat
WA	1091	62	130.7	wheat
WA	1092	29	115.6	wheat
WA	1092	41	107.6	wheat
WA	1092	17	76.1	wheat
WA	1092	15	82.6	wheat
WA	1093	39	154.5	wheat
WA	1093	36	175.9	wheat
WA	1093	46	165.5	wheat
WA	1093	52	156.9	wheat
WA	1094	4	7.1	wheat
WA	1094	7	14.6	wheat
WA	1094	3	16.9	wheat
WA	1094	3	13.6	wheat
WA	1095	39	115.5	wheat
WA	1095	27	74.2	wheat
WA	1095	27	70.4	wheat
WA	1095	25	137.8	wheat
WA	1096	50	186	wheat
WA	1096	39	186.4	wheat
WA	1096	55	174.7	wheat
WA	1096	na	214.4	wheat
WA	1097	37	88.3	wheat
WA	1097	17	74.4	wheat
WA	1097	4	41.5	wheat
WA	1097	6	38.5	wheat
WA	1098	na	136.5	wheat
WA	1098	46	116.1	wheat
WA	1098	44.5	103.9	wheat
WA	1098	32	92.1	wheat
WA	1099	24	48.2	wheat
WA	1099	15	45.7	wheat
WA	1099	12	52.5	wheat
WA	1099	15	38.6	wheat
WA	1100	9.5	27.1	wheat
WA	1100	3	83.8	wheat
WA	1100	16	36.1	wheat
WA	1100	8	60.7	wheat
WA	1101	30	69.8	wheat
WA	1101	27	67.3	wheat
WA	1101	29	83.3	wheat
WA	1101	20	42.2	wheat
WA	1102	2	17.8	wheat
WA	1102	11	61.5	wheat
WA	1102	22	137.6	wheat
WA	1102	21	93.9	wheat
WA	1103	72	230.8	wheat
WA	1103	63	186.2	wheat
WA	1103	67	155.1	wheat
WA	1103	73	216.4	wheat
MT	1104	35	41.77	wheat
MT	1104	22	73.17	wheat
MT	1104	30	39.07	wheat
MT	1104	15	34.47	wheat
MT	1105	3	3.1	wheat
MT	1105	4.5	7.2	wheat
MT	1105	2.5	5	wheat
MT	1105	3.5	6.2	wheat
MT	1106	16	39.07	wheat
MT	1106	25	110.57	wheat
MT	1106	25	54.87	wheat
MT	1106	15	44.97	wheat
MT	1108	13	30.17	wheat
MT	1108	10.5	32.87	wheat
MT	1108	11.5	37.17	wheat
MT	1108	15	44.87	wheat
MT	1113	2.5	2.3	wheat
MT	1113	2	1.9	wheat
MT	1113	3	1.9	wheat
MT	1113	2	3.3	wheat
MT	1116	2	1.5	wheat
MT	1116	2	0.3	wheat
MT	1116	1	0.4	wheat
MT	1116	2	0.5	wheat
MT	1117	1.5	0.3	wheat
MT	1117	1	0.3	wheat
MT	1117	1.5	1.4	wheat
MT	1117	0.5	0.1	wheat
ND	1408	11	80.57	wheat
ND	1408	10	58.97	wheat
ND	1408	10	45.47	wheat
ND	1408	15	33.27	wheat
ND	1411	12.5	162.27	wheat
ND	1411	20	83.97	wheat
ND	1411	13	83.97	wheat
ND	1411	10.5	96.47	wheat
MN/WI	1364	19	153.35	wheat
MN/WI	1364	28	159.87	wheat
MN/WI	1364	19	199.47	wheat
MN/WI	1364	27	156.37	wheat
MN/WI	1371	8	17.27	wheat
MN/WI	1371	7	44.17	wheat
MN/WI	1371	7	13.97	wheat
MN/WI	1371	9	27.87	wheat
MN/WI	1372	8	19.3	wheat
MN/WI	1372	9	13.57	wheat
MN/WI	1372	7	13.77	wheat
MN/WI	1372	10	25.37	wheat
KS	1161	3.5	0.07	wheat
KS	1161	5.5	0.17	wheat
KS	1161	7.5	0.1	wheat
KS	1161	5	0.1	wheat
KS	1164	2.5	25.27	wheat
KS	1164	2.5	24.87	wheat
KS	1164	2.5	27.97	wheat
KS	1164	3.5	30.47	wheat
KS	1168	3	55.97	wheat
KS	1168	5.5	84.37	wheat
KS	1168	19	150.97	wheat
KS	1168	12	172.87	wheat
KS	1171	6	35.07	wheat
KS	1171	6	75.37	wheat
KS	1171	4.5	82.57	wheat
KS	1171	5	44.27	wheat
KS	1175	2.5	9.87	wheat
KS	1175	2	6.27	wheat
KS	1175	4	20.07	wheat
KS	1175	5.5	22.87	wheat
MN/WI	1369	16	69.47	wheat
MN/WI	1369	22	56.87	wheat
MN/WI	1369	22	93.87	wheat
MN/WI	1369	13	38.07	wheat
MT	1111	3.5	9.47	wheat
MT	1111	3	8.9	wheat
MT	1111	5	9.6	wheat
MT	1111	3	8.5	wheat
MT	1115	10	21.67	wheat
MT	1115	8.5	26.27	wheat
MT	1115	12	42.37	wheat
MT	1115	13.5	35.47	wheat
